# Supplementary material
Source: publisher site journal article supplement (https://www.spandidos-publications.com/6709/downloadSupplementary)
Supplement: Supplementary file 1 [file downloadSupplementary]

## Sheet: Table S4
Table SIV. KEGG enrichment of differentially expressed ferroptosis-related genes in GSE143303 dataset.
#Term	Database	ID	Input number	Background number	P-Value	Corrected P-Value	Input	Hyperlink
Ferroptosis	KEGG PATHWAY	hsa04216	8	40	6.53e-15	1.14e-12	SAT1|SLC40A1|NCOA4|ACSL3|HMOX1|CYBB|TFRC|TF	http://www.genome.jp/kegg-bin/show_pathway?hsa04216/hsa:3162%09red/hsa:7018%09red/hsa:30061%09red/hsa:8031%09red/hsa:6303%09red/hsa:7037%09red/hsa:2181%09red/hsa:1536%09red
HIF-1 signaling pathway	KEGG PATHWAY	hsa04066	7	109	5.51e-10	4.82e-08	CYBB|CDKN1A|HMOX1|IL6|TFRC|TLR4|TF	http://www.genome.jp/kegg-bin/show_pathway?hsa04066/hsa:3569%09red/hsa:1026%09red/hsa:7099%09red/hsa:7018%09red/hsa:3162%09red/hsa:7037%09red/hsa:1536%09red
Pathways in cancer	KEGG PATHWAY	hsa05200	10	530	8.99e-09	4.26e-07	PTGS2|NCOA4|NFE2L2|HRAS|HMOX1|NQO1|IL6|TXNRD1|CDKN1A|KRAS	http://www.genome.jp/kegg-bin/show_pathway?hsa05200/hsa:3569%09red/hsa:3162%09red/hsa:1026%09red/hsa:7296%09red/hsa:3265%09red/hsa:8031%09red/hsa:1728%09red/hsa:3845%09red/hsa:5743%09red/hsa:4780%09red
Hepatocellular carcinoma	KEGG PATHWAY	hsa05225	7	168	9.73e-09	4.26e-07	NFE2L2|HRAS|HMOX1|NQO1|TXNRD1|CDKN1A|KRAS	http://www.genome.jp/kegg-bin/show_pathway?hsa05225/hsa:1026%09red/hsa:3162%09red/hsa:4780%09red/hsa:7296%09red/hsa:3265%09red/hsa:1728%09red/hsa:3845%09red
Kaposi sarcoma-associated herpesvirus infection	KEGG PATHWAY	hsa05167	7	186	1.91e-08	6.7e-07	PTGS2|CXCL2|HRAS|IL6|ZFP36|CDKN1A|KRAS	http://www.genome.jp/kegg-bin/show_pathway?hsa05167/hsa:3569%09red/hsa:3265%09red/hsa:2920%09red/hsa:5743%09red/hsa:7538%09red/hsa:3845%09red/hsa:1026%09red
MicroRNAs in cancer	KEGG PATHWAY	hsa05206	7	299	4.39e-07	1.19e-05	PTGS2|SOCS1|HRAS|HMOX1|MIR9-1|CDKN1A|KRAS	http://www.genome.jp/kegg-bin/show_pathway?hsa05206/hsa:1026%09red/hsa:8651%09red/hsa:3162%09red/hsa:3265%09red/hsa:5743%09red/hsa:407046%09red/hsa:3845%09red
Thyroid cancer	KEGG PATHWAY	hsa05216	4	37	4.76e-07	1.19e-05	HRAS|CDKN1A|NCOA4|KRAS	http://www.genome.jp/kegg-bin/show_pathway?hsa05216/hsa:1026%09red/hsa:8031%09red/hsa:3845%09red/hsa:3265%09red
AGE-RAGE signaling pathway in diabetic complications	KEGG PATHWAY	hsa04933	5	100	6.01e-07	1.31e-05	IL6|CYBB|HRAS|NOX4|KRAS	http://www.genome.jp/kegg-bin/show_pathway?hsa04933/hsa:50507%09red/hsa:3569%09red/hsa:3845%09red/hsa:3265%09red/hsa:1536%09red
Serotonergic synapse	KEGG PATHWAY	hsa04726	5	115	1.16e-06	2.26e-05	PTGS2|HRAS|ALOX15B|ALOX12B|KRAS	http://www.genome.jp/kegg-bin/show_pathway?hsa04726/hsa:247%09red/hsa:5743%09red/hsa:3845%09red/hsa:242%09red/hsa:3265%09red
PI3K-Akt signaling pathway	KEGG PATHWAY	hsa04151	7	354	1.32e-06	2.31e-05	HRAS|PRKAA1|IL6|TLR4|BAP1|CDKN1A|KRAS	http://www.genome.jp/kegg-bin/show_pathway?hsa04151/hsa:3569%09red/hsa:3265%09red/hsa:1026%09red/hsa:7099%09red/hsa:5562%09red/hsa:3845%09red/hsa:9223%09red
Metabolic pathways	KEGG PATHWAY	hsa01100	12	1433	1.59e-06	2.53e-05	PTGS2|GCH1|SAT1|ACSL3|G6PD|HMOX1|NQO1|CBS|NNMT|ACO1|ALOX15B|ALOX12B	http://www.genome.jp/kegg-bin/show_pathway?hsa01100/hsa:2539%09red/hsa:247%09red/hsa:5743%09red/hsa:4837%09red/hsa:2643%09red/hsa:48%09red/hsa:6303%09red/hsa:1728%09red/hsa:242%09red/hsa:3162%09red/hsa:102724560%09red/hsa:2181%09red
Autophagy - animal	KEGG PATHWAY	hsa04140	5	128	1.93e-06	2.82e-05	HRAS|EIF2S1|LAMP2|PRKAA1|KRAS	http://www.genome.jp/kegg-bin/show_pathway?hsa04140/hsa:3920%09red/hsa:1965%09red/hsa:5562%09red/hsa:3845%09red/hsa:3265%09red
FoxO signaling pathway	KEGG PATHWAY	hsa04068	5	132	2.24e-06	3.01e-05	IL6|HRAS|CDKN1A|PRKAA1|KRAS	http://www.genome.jp/kegg-bin/show_pathway?hsa04068/hsa:3569%09red/hsa:5562%09red/hsa:3845%09red/hsa:3265%09red/hsa:1026%09red
Insulin signaling pathway	KEGG PATHWAY	hsa04910	5	137	2.67e-06	3.19e-05	HRAS|SOCS1|PHKG2|PRKAA1|KRAS	http://www.genome.jp/kegg-bin/show_pathway?hsa04910/hsa:5562%09red/hsa:8651%09red/hsa:5261%09red/hsa:3845%09red/hsa:3265%09red
VEGF signaling pathway	KEGG PATHWAY	hsa04370	4	59	2.73e-06	3.19e-05	PTGS2|HRAS|HSPB1|KRAS	http://www.genome.jp/kegg-bin/show_pathway?hsa04370/hsa:5743%09red/hsa:3315%09red/hsa:3845%09red/hsa:3265%09red
Oxytocin signaling pathway	KEGG PATHWAY	hsa04921	5	153	4.5e-06	4.92e-05	PTGS2|HRAS|CDKN1A|PRKAA1|KRAS	http://www.genome.jp/kegg-bin/show_pathway?hsa04921/hsa:5743%09red/hsa:5562%09red/hsa:3845%09red/hsa:3265%09red/hsa:1026%09red
Central carbon metabolism in cancer	KEGG PATHWAY	hsa05230	4	69	4.93e-06	5.08e-05	HRAS|SLC7A5|KRAS|G6PD	http://www.genome.jp/kegg-bin/show_pathway?hsa05230/hsa:2539%09red/hsa:3845%09red/hsa:3265%09red/hsa:8140%09red
Hepatitis B	KEGG PATHWAY	hsa05161	5	163	6.07e-06	5.9e-05	IL6|HRAS|CDKN1A|TLR4|KRAS	http://www.genome.jp/kegg-bin/show_pathway?hsa05161/hsa:3569%09red/hsa:7099%09red/hsa:3845%09red/hsa:3265%09red/hsa:1026%09red
NOD-like receptor signaling pathway	KEGG PATHWAY	hsa04621	5	178	9.19e-06	8.47e-05	IL6|CYBB|CXCL2|TLR4|TNFAIP3	http://www.genome.jp/kegg-bin/show_pathway?hsa04621/hsa:3569%09red/hsa:2920%09red/hsa:7128%09red/hsa:7099%09red/hsa:1536%09red
IL-17 signaling pathway	KEGG PATHWAY	hsa04657	4	93	1.53e-05	0.000133754	IL6|PTGS2|CXCL2|TNFAIP3	http://www.genome.jp/kegg-bin/show_pathway?hsa04657/hsa:3569%09red/hsa:2920%09red/hsa:7128%09red/hsa:5743%09red
NF-kappa B signaling pathway	KEGG PATHWAY	hsa04064	4	100	2.01e-05	0.000167709	PTGS2|CXCL2|TLR4|TNFAIP3	http://www.genome.jp/kegg-bin/show_pathway?hsa04064/hsa:5743%09red/hsa:7099%09red/hsa:7128%09red/hsa:2920%09red
C-type lectin receptor signaling pathway	KEGG PATHWAY	hsa04625	4	104	2.33e-05	0.00018511	IL6|PTGS2|HRAS|KRAS	http://www.genome.jp/kegg-bin/show_pathway?hsa04625/hsa:3569%09red/hsa:3845%09red/hsa:3265%09red/hsa:5743%09red
Human T-cell leukemia virus 1 infection	KEGG PATHWAY	hsa05166	5	219	2.43e-05	0.00018511	IL6|HRAS|ZFP36|CDKN1A|KRAS	http://www.genome.jp/kegg-bin/show_pathway?hsa05166/hsa:3569%09red/hsa:7538%09red/hsa:3845%09red/hsa:3265%09red/hsa:1026%09red
Human cytomegalovirus infection	KEGG PATHWAY	hsa05163	5	225	2.76e-05	0.000201292	IL6|PTGS2|HRAS|CDKN1A|KRAS	http://www.genome.jp/kegg-bin/show_pathway?hsa05163/hsa:3569%09red/hsa:1026%09red/hsa:3845%09red/hsa:3265%09red/hsa:5743%09red
TNF signaling pathway	KEGG PATHWAY	hsa04668	4	112	3.09e-05	0.000216399	IL6|PTGS2|CXCL2|TNFAIP3	http://www.genome.jp/kegg-bin/show_pathway?hsa04668/hsa:3569%09red/hsa:2920%09red/hsa:7128%09red/hsa:5743%09red
Bladder cancer	KEGG PATHWAY	hsa05219	3	41	4.28e-05	0.000288323	HRAS|CDKN1A|KRAS	http://www.genome.jp/kegg-bin/show_pathway?hsa05219/hsa:1026%09red/hsa:3845%09red/hsa:3265%09red
Measles	KEGG PATHWAY	hsa05162	4	138	6.81e-05	0.000437059	IL6|EIF2S1|TLR4|TNFAIP3	http://www.genome.jp/kegg-bin/show_pathway?hsa05162/hsa:3569%09red/hsa:1965%09red/hsa:7128%09red/hsa:7099%09red
Fluid shear stress and atherosclerosis	KEGG PATHWAY	hsa05418	4	139	6.99e-05	0.000437059	NFE2L2|HMOX1|PRKAA1|NQO1	http://www.genome.jp/kegg-bin/show_pathway?hsa05418/hsa:4780%09red/hsa:1728%09red/hsa:5562%09red/hsa:3162%09red
Mineral absorption	KEGG PATHWAY	hsa04978	3	53	8.85e-05	0.000534036	TF|HMOX1|SLC40A1	http://www.genome.jp/kegg-bin/show_pathway?hsa04978/hsa:7018%09red/hsa:30061%09red/hsa:3162%09red
Phagosome	KEGG PATHWAY	hsa04145	4	152	9.79e-05	0.000548967	CYBB|TFRC|LAMP2|TLR4	http://www.genome.jp/kegg-bin/show_pathway?hsa04145/hsa:3920%09red/hsa:7099%09red/hsa:7037%09red/hsa:1536%09red
Legionellosis	KEGG PATHWAY	hsa05134	3	55	9.83e-05	0.000548967	IL6|CXCL2|TLR4	http://www.genome.jp/kegg-bin/show_pathway?hsa05134/hsa:3569%09red/hsa:7099%09red/hsa:2920%09red
mTOR signaling pathway	KEGG PATHWAY	hsa04150	4	153	0.000100382	0.000548967	HRAS|SLC7A5|PRKAA1|KRAS	http://www.genome.jp/kegg-bin/show_pathway?hsa04150/hsa:5562%09red/hsa:3845%09red/hsa:3265%09red/hsa:8140%09red
Hepatitis C	KEGG PATHWAY	hsa05160	4	155	0.000105408	0.000558981	HRAS|EIF2S1|CDKN1A|KRAS	http://www.genome.jp/kegg-bin/show_pathway?hsa05160/hsa:1026%09red/hsa:1965%09red/hsa:3845%09red/hsa:3265%09red
Endometrial cancer	KEGG PATHWAY	hsa05213	3	58	0.000114278	0.000588196	HRAS|CDKN1A|KRAS	http://www.genome.jp/kegg-bin/show_pathway?hsa05213/hsa:1026%09red/hsa:3845%09red/hsa:3265%09red
Cellular senescence	KEGG PATHWAY	hsa04218	4	160	0.000118768	0.000588575	IL6|HRAS|CDKN1A|KRAS	http://www.genome.jp/kegg-bin/show_pathway?hsa04218/hsa:3569%09red/hsa:3845%09red/hsa:3265%09red/hsa:1026%09red
Necroptosis	KEGG PATHWAY	hsa04217	4	162	0.000124442	0.000588575	CYBB|TLR4|CHMP5|TNFAIP3	http://www.genome.jp/kegg-bin/show_pathway?hsa04217/hsa:7099%09red/hsa:51510%09red/hsa:7128%09red/hsa:1536%09red
Jak-STAT signaling pathway	KEGG PATHWAY	hsa04630	4	162	0.000124442	0.000588575	IL6|HRAS|SOCS1|CDKN1A	http://www.genome.jp/kegg-bin/show_pathway?hsa04630/hsa:3569%09red/hsa:8651%09red/hsa:3265%09red/hsa:1026%09red
Longevity regulating pathway - multiple species	KEGG PATHWAY	hsa04213	3	62	0.000138095	0.000635965	HRAS|PRKAA1|KRAS	http://www.genome.jp/kegg-bin/show_pathway?hsa04213/hsa:5562%09red/hsa:3845%09red/hsa:3265%09red
Arachidonic acid metabolism	KEGG PATHWAY	hsa00590	3	63	0.000144514	0.000648462	PTGS2|ALOX12B|ALOX15B	http://www.genome.jp/kegg-bin/show_pathway?hsa00590/hsa:247%09red/hsa:5743%09red/hsa:242%09red
Human papillomavirus infection	KEGG PATHWAY	hsa05165	5	330	0.000162386	0.000703959	PTGS2|HRAS|BAP1|CDKN1A|KRAS	http://www.genome.jp/kegg-bin/show_pathway?hsa05165/hsa:5743%09red/hsa:9223%09red/hsa:3845%09red/hsa:3265%09red/hsa:1026%09red
Non-small cell lung cancer	KEGG PATHWAY	hsa05223	3	66	0.000164928	0.000703959	HRAS|CDKN1A|KRAS	http://www.genome.jp/kegg-bin/show_pathway?hsa05223/hsa:1026%09red/hsa:3845%09red/hsa:3265%09red
Renal cell carcinoma	KEGG PATHWAY	hsa05211	3	69	0.000187127	0.000779696	HRAS|CDKN1A|KRAS	http://www.genome.jp/kegg-bin/show_pathway?hsa05211/hsa:1026%09red/hsa:3845%09red/hsa:3265%09red
Prolactin signaling pathway	KEGG PATHWAY	hsa04917	3	70	0.000194935	0.000793341	HRAS|SOCS1|KRAS	http://www.genome.jp/kegg-bin/show_pathway?hsa04917/hsa:8651%09red/hsa:3845%09red/hsa:3265%09red
Melanoma	KEGG PATHWAY	hsa05218	3	72	0.000211179	0.000839916	HRAS|CDKN1A|KRAS	http://www.genome.jp/kegg-bin/show_pathway?hsa05218/hsa:1026%09red/hsa:3845%09red/hsa:3265%09red
Leishmaniasis	KEGG PATHWAY	hsa05140	3	74	0.000228275	0.000887737	CYBB|PTGS2|TLR4	http://www.genome.jp/kegg-bin/show_pathway?hsa05140/hsa:5743%09red/hsa:7099%09red/hsa:1536%09red
Glioma	KEGG PATHWAY	hsa05214	3	75	0.000237149	0.000902197	HRAS|CDKN1A|KRAS	http://www.genome.jp/kegg-bin/show_pathway?hsa05214/hsa:1026%09red/hsa:3845%09red/hsa:3265%09red
Chronic myeloid leukemia	KEGG PATHWAY	hsa05220	3	76	0.000246243	0.000916863	HRAS|CDKN1A|KRAS	http://www.genome.jp/kegg-bin/show_pathway?hsa05220/hsa:1026%09red/hsa:3845%09red/hsa:3265%09red
EGFR tyrosine kinase inhibitor resistance	KEGG PATHWAY	hsa01521	3	79	0.000274871	0.00100213	IL6|HRAS|KRAS	http://www.genome.jp/kegg-bin/show_pathway?hsa01521/hsa:3569%09red/hsa:3845%09red/hsa:3265%09red
Proteoglycans in cancer	KEGG PATHWAY	hsa05205	4	203	0.000289306	0.00103323	HRAS|CDKN1A|TLR4|KRAS	http://www.genome.jp/kegg-bin/show_pathway?hsa05205/hsa:1026%09red/hsa:3845%09red/hsa:3265%09red/hsa:7099%09red
Salmonella infection	KEGG PATHWAY	hsa05132	3	83	0.000316267	0.00110693	IL6|CXCL2|TLR4	http://www.genome.jp/kegg-bin/show_pathway?hsa05132/hsa:3569%09red/hsa:7099%09red/hsa:2920%09red
ErbB signaling pathway	KEGG PATHWAY	hsa04012	3	85	0.000338389	0.00116114	HRAS|CDKN1A|KRAS	http://www.genome.jp/kegg-bin/show_pathway?hsa04012/hsa:1026%09red/hsa:3845%09red/hsa:3265%09red
Colorectal cancer	KEGG PATHWAY	hsa05210	3	86	0.000349814	0.00117726	HRAS|CDKN1A|KRAS	http://www.genome.jp/kegg-bin/show_pathway?hsa05210/hsa:1026%09red/hsa:3845%09red/hsa:3265%09red
PD-L1 expression and PD-1 checkpoint pathway in cancer	KEGG PATHWAY	hsa05235	3	89	0.000385572	0.00124954	HRAS|TLR4|KRAS	http://www.genome.jp/kegg-bin/show_pathway?hsa05235/hsa:7099%09red/hsa:3845%09red/hsa:3265%09red
Longevity regulating pathway	KEGG PATHWAY	hsa04211	3	89	0.000385572	0.00124954	HRAS|PRKAA1|KRAS	http://www.genome.jp/kegg-bin/show_pathway?hsa04211/hsa:5562%09red/hsa:3845%09red/hsa:3265%09red
Amoebiasis	KEGG PATHWAY	hsa05146	3	95	0.00046396	0.00145992	IL6|TLR4|HSPB1	http://www.genome.jp/kegg-bin/show_pathway?hsa05146/hsa:3569%09red/hsa:3315%09red/hsa:7099%09red
Thermogenesis	KEGG PATHWAY	hsa04714	4	231	0.000467173	0.00145992	ACSL3|HRAS|PRKAA1|KRAS	http://www.genome.jp/kegg-bin/show_pathway?hsa04714/hsa:2181%09red/hsa:5562%09red/hsa:3845%09red/hsa:3265%09red
Prostate cancer	KEGG PATHWAY	hsa05215	3	97	0.00049219	0.00151111	HRAS|CDKN1A|KRAS	http://www.genome.jp/kegg-bin/show_pathway?hsa05215/hsa:1026%09red/hsa:3845%09red/hsa:3265%09red
Endocrine resistance	KEGG PATHWAY	hsa01522	3	98	0.000506708	0.00152886	HRAS|CDKN1A|KRAS	http://www.genome.jp/kegg-bin/show_pathway?hsa01522/hsa:1026%09red/hsa:3845%09red/hsa:3265%09red
Circadian rhythm	KEGG PATHWAY	hsa04710	2	31	0.00117366	0.0034812	ARNTL|PRKAA1	http://www.genome.jp/kegg-bin/show_pathway?hsa04710/hsa:406%09red/hsa:5562%09red
Apoptosis	KEGG PATHWAY	hsa04210	3	136	0.00127811	0.00372781	HRAS|EIF2S1|KRAS	http://www.genome.jp/kegg-bin/show_pathway?hsa04210/hsa:1965%09red/hsa:3845%09red/hsa:3265%09red
Apelin signaling pathway	KEGG PATHWAY	hsa04371	3	137	0.00130468	0.00374294	HRAS|PRKAA1|KRAS	http://www.genome.jp/kegg-bin/show_pathway?hsa04371/hsa:5562%09red/hsa:3845%09red/hsa:3265%09red
Breast cancer	KEGG PATHWAY	hsa05224	3	147	0.00158976	0.00448723	HRAS|CDKN1A|KRAS	http://www.genome.jp/kegg-bin/show_pathway?hsa05224/hsa:1026%09red/hsa:3845%09red/hsa:3265%09red
Non-alcoholic fatty liver disease (NAFLD)	KEGG PATHWAY	hsa04932	3	149	0.00165107	0.00451465	IL6|EIF2S1|PRKAA1	http://www.genome.jp/kegg-bin/show_pathway?hsa04932/hsa:3569%09red/hsa:1965%09red/hsa:5562%09red
Gastric cancer	KEGG PATHWAY	hsa05226	3	149	0.00165107	0.00451465	HRAS|CDKN1A|KRAS	http://www.genome.jp/kegg-bin/show_pathway?hsa05226/hsa:1026%09red/hsa:3845%09red/hsa:3265%09red
Influenza A	KEGG PATHWAY	hsa05164	3	167	0.0022702	0.00611208	IL6|EIF2S1|TLR4	http://www.genome.jp/kegg-bin/show_pathway?hsa05164/hsa:3569%09red/hsa:1965%09red/hsa:7099%09red
Tuberculosis	KEGG PATHWAY	hsa05152	3	179	0.00275311	0.00727311	IL6|LAMP2|TLR4	http://www.genome.jp/kegg-bin/show_pathway?hsa05152/hsa:3920%09red/hsa:3569%09red/hsa:7099%09red
Malaria	KEGG PATHWAY	hsa05144	2	49	0.00278456	0.00727311	IL6|TLR4	http://www.genome.jp/kegg-bin/show_pathway?hsa05144/hsa:3569%09red/hsa:7099%09red
Chemokine signaling pathway	KEGG PATHWAY	hsa04062	3	190	0.00324747	0.00835746	HRAS|CXCL2|KRAS	http://www.genome.jp/kegg-bin/show_pathway?hsa04062/hsa:3845%09red/hsa:3265%09red/hsa:2920%09red
Viral carcinogenesis	KEGG PATHWAY	hsa05203	3	201	0.00379304	0.00948259	HRAS|CDKN1A|KRAS	http://www.genome.jp/kegg-bin/show_pathway?hsa05203/hsa:1026%09red/hsa:3845%09red/hsa:3265%09red
Epstein-Barr virus infection	KEGG PATHWAY	hsa05169	3	201	0.00379304	0.00948259	IL6|CDKN1A|TNFAIP3	http://www.genome.jp/kegg-bin/show_pathway?hsa05169/hsa:3569%09red/hsa:7128%09red/hsa:1026%09red
Long-term depression	KEGG PATHWAY	hsa04730	2	60	0.00408566	0.0100703	HRAS|KRAS	http://www.genome.jp/kegg-bin/show_pathway?hsa04730/hsa:3845%09red/hsa:3265%09red
Rap1 signaling pathway	KEGG PATHWAY	hsa04015	3	210	0.00427859	0.0103994	HRAS|BAP1|KRAS	http://www.genome.jp/kegg-bin/show_pathway?hsa04015/hsa:9223%09red/hsa:3845%09red/hsa:3265%09red
Human immunodeficiency virus 1 infection	KEGG PATHWAY	hsa05170	3	212	0.00439137	0.0105273	HRAS|TLR4|KRAS	http://www.genome.jp/kegg-bin/show_pathway?hsa05170/hsa:7099%09red/hsa:3845%09red/hsa:3265%09red
Mitophagy - animal	KEGG PATHWAY	hsa04137	2	65	0.00475375	0.0110921	HRAS|KRAS	http://www.genome.jp/kegg-bin/show_pathway?hsa04137/hsa:3845%09red/hsa:3265%09red
Inflammatory bowel disease (IBD)	KEGG PATHWAY	hsa05321	2	65	0.00475375	0.0110921	IL6|TLR4	http://www.genome.jp/kegg-bin/show_pathway?hsa05321/hsa:3569%09red/hsa:7099%09red
Acute myeloid leukemia	KEGG PATHWAY	hsa05221	2	66	0.00489302	0.0112668	HRAS|KRAS	http://www.genome.jp/kegg-bin/show_pathway?hsa05221/hsa:3845%09red/hsa:3265%09red
Long-term potentiation	KEGG PATHWAY	hsa04720	2	67	0.00503415	0.0114413	HRAS|KRAS	http://www.genome.jp/kegg-bin/show_pathway?hsa04720/hsa:3845%09red/hsa:3265%09red
Fc epsilon RI signaling pathway	KEGG PATHWAY	hsa04664	2	68	0.00517715	0.0116154	HRAS|KRAS	http://www.genome.jp/kegg-bin/show_pathway?hsa04664/hsa:3845%09red/hsa:3265%09red
Adipocytokine signaling pathway	KEGG PATHWAY	hsa04920	2	69	0.00532201	0.0117893	ACSL3|PRKAA1	http://www.genome.jp/kegg-bin/show_pathway?hsa04920/hsa:2181%09red/hsa:5562%09red
p53 signaling pathway	KEGG PATHWAY	hsa04115	2	72	0.00576768	0.0126168	AIFM2|CDKN1A	http://www.genome.jp/kegg-bin/show_pathway?hsa04115/hsa:84883%09red/hsa:1026%09red
Pancreatic cancer	KEGG PATHWAY	hsa05212	2	75	0.00622986	0.0132954	CDKN1A|KRAS	http://www.genome.jp/kegg-bin/show_pathway?hsa05212/hsa:1026%09red/hsa:3845%09red
Biosynthesis of amino acids	KEGG PATHWAY	hsa01230	2	75	0.00622986	0.0132954	ACO1|CBS	http://www.genome.jp/kegg-bin/show_pathway?hsa01230/hsa:48%09red/hsa:102724560%09red
Pertussis	KEGG PATHWAY	hsa05133	2	76	0.00638756	0.0134273	IL6|TLR4	http://www.genome.jp/kegg-bin/show_pathway?hsa05133/hsa:3569%09red/hsa:7099%09red
Endocytosis	KEGG PATHWAY	hsa04144	3	244	0.00644512	0.0134273	HRAS|TFRC|CHMP5	http://www.genome.jp/kegg-bin/show_pathway?hsa04144/hsa:7037%09red/hsa:51510%09red/hsa:3265%09red
B cell receptor signaling pathway	KEGG PATHWAY	hsa04662	2	82	0.00737163	0.0150004	HRAS|KRAS	http://www.genome.jp/kegg-bin/show_pathway?hsa04662/hsa:3845%09red/hsa:3265%09red
Chemical carcinogenesis	KEGG PATHWAY	hsa05204	2	82	0.00737163	0.0150004	PTGS2|AKR1C2	http://www.genome.jp/kegg-bin/show_pathway?hsa05204/hsa:5743%09red/hsa:1646%09red
Gap junction	KEGG PATHWAY	hsa04540	2	88	0.0084197	0.0169362	HRAS|KRAS	http://www.genome.jp/kegg-bin/show_pathway?hsa04540/hsa:3845%09red/hsa:3265%09red
Hypertrophic cardiomyopathy (HCM)	KEGG PATHWAY	hsa05410	2	90	0.00878307	0.0174663	IL6|PRKAA1	http://www.genome.jp/kegg-bin/show_pathway?hsa05410/hsa:3569%09red/hsa:5562%09red
Rheumatoid arthritis	KEGG PATHWAY	hsa05323	2	91	0.00896736	0.0176324	IL6|TLR4	http://www.genome.jp/kegg-bin/show_pathway?hsa05323/hsa:3569%09red/hsa:7099%09red
Small cell lung cancer	KEGG PATHWAY	hsa05222	2	93	0.00934111	0.0179637	PTGS2|CDKN1A	http://www.genome.jp/kegg-bin/show_pathway?hsa05222/hsa:5743%09red/hsa:1026%09red
GnRH signaling pathway	KEGG PATHWAY	hsa04912	2	93	0.00934111	0.0179637	HRAS|KRAS	http://www.genome.jp/kegg-bin/show_pathway?hsa04912/hsa:3845%09red/hsa:3265%09red
Hematopoietic cell lineage	KEGG PATHWAY	hsa04640	2	97	0.0101092	0.0192294	IL6|TFRC	http://www.genome.jp/kegg-bin/show_pathway?hsa04640/hsa:3569%09red/hsa:7037%09red
Choline metabolism in cancer	KEGG PATHWAY	hsa05231	2	99	0.0105034	0.0193739	HRAS|KRAS	http://www.genome.jp/kegg-bin/show_pathway?hsa05231/hsa:3845%09red/hsa:3265%09red
Progesterone-mediated oocyte maturation	KEGG PATHWAY	hsa04914	2	99	0.0105034	0.0193739	AURKA|KRAS	http://www.genome.jp/kegg-bin/show_pathway?hsa04914/hsa:6790%09red/hsa:3845%09red
Cytokine-cytokine receptor interaction	KEGG PATHWAY	hsa04060	3	294	0.010642	0.0193739	IL6|GDF15|CXCL2	http://www.genome.jp/kegg-bin/show_pathway?hsa04060/hsa:3569%09red/hsa:9518%09red/hsa:2920%09red
Viral protein interaction with cytokine and cytokine receptor	KEGG PATHWAY	hsa04061	2	100	0.010703	0.0193739	IL6|CXCL2	http://www.genome.jp/kegg-bin/show_pathway?hsa04061/hsa:3569%09red/hsa:2920%09red
MAPK signaling pathway	KEGG PATHWAY	hsa04010	3	295	0.0107387	0.0193739	HRAS|HSPB1|KRAS	http://www.genome.jp/kegg-bin/show_pathway?hsa04010/hsa:3315%09red/hsa:3845%09red/hsa:3265%09red
Melanogenesis	KEGG PATHWAY	hsa04916	2	101	0.0109043	0.019472	HRAS|KRAS	http://www.genome.jp/kegg-bin/show_pathway?hsa04916/hsa:3845%09red/hsa:3265%09red
Chagas disease (American trypanosomiasis)	KEGG PATHWAY	hsa05142	2	103	0.011312	0.019796	IL6|TLR4	http://www.genome.jp/kegg-bin/show_pathway?hsa05142/hsa:3569%09red/hsa:7099%09red
T cell receptor signaling pathway	KEGG PATHWAY	hsa04660	2	103	0.011312	0.019796	HRAS|KRAS	http://www.genome.jp/kegg-bin/show_pathway?hsa04660/hsa:3845%09red/hsa:3265%09red
Toll-like receptor signaling pathway	KEGG PATHWAY	hsa04620	2	104	0.0115183	0.0199575	IL6|TLR4	http://www.genome.jp/kegg-bin/show_pathway?hsa04620/hsa:3569%09red/hsa:7099%09red
Glucagon signaling pathway	KEGG PATHWAY	hsa04922	2	106	0.0119359	0.0204783	PHKG2|PRKAA1	http://www.genome.jp/kegg-bin/show_pathway?hsa04922/hsa:5562%09red/hsa:5261%09red
Insulin resistance	KEGG PATHWAY	hsa04931	2	108	0.0123601	0.0210002	IL6|PRKAA1	http://www.genome.jp/kegg-bin/show_pathway?hsa04931/hsa:3569%09red/hsa:5562%09red
Cholinergic synapse	KEGG PATHWAY	hsa04725	2	112	0.013228	0.0222587	HRAS|KRAS	http://www.genome.jp/kegg-bin/show_pathway?hsa04725/hsa:3845%09red/hsa:3265%09red
Toxoplasmosis	KEGG PATHWAY	hsa05145	2	113	0.0134491	0.0224151	SOCS1|TLR4	http://www.genome.jp/kegg-bin/show_pathway?hsa05145/hsa:7099%09red/hsa:8651%09red
Carbon metabolism	KEGG PATHWAY	hsa01200	2	117	0.0143493	0.0236898	ACO1|G6PD	http://www.genome.jp/kegg-bin/show_pathway?hsa01200/hsa:48%09red/hsa:2539%09red
Neurotrophin signaling pathway	KEGG PATHWAY	hsa04722	2	119	0.0148089	0.0237758	HRAS|KRAS	http://www.genome.jp/kegg-bin/show_pathway?hsa04722/hsa:3845%09red/hsa:3265%09red
Sphingolipid signaling pathway	KEGG PATHWAY	hsa04071	2	119	0.0148089	0.0237758	HRAS|KRAS	http://www.genome.jp/kegg-bin/show_pathway?hsa04071/hsa:3845%09red/hsa:3265%09red
Thyroid hormone signaling pathway	KEGG PATHWAY	hsa04919	2	119	0.0148089	0.0237758	HRAS|KRAS	http://www.genome.jp/kegg-bin/show_pathway?hsa04919/hsa:3845%09red/hsa:3265%09red
Yersinia infection	KEGG PATHWAY	hsa05135	2	121	0.0152749	0.0243009	IL6|TLR4	http://www.genome.jp/kegg-bin/show_pathway?hsa05135/hsa:3569%09red/hsa:7099%09red
Relaxin signaling pathway	KEGG PATHWAY	hsa04926	2	130	0.0174486	0.0275091	HRAS|KRAS	http://www.genome.jp/kegg-bin/show_pathway?hsa04926/hsa:3845%09red/hsa:3265%09red
Natural killer cell mediated cytotoxicity	KEGG PATHWAY	hsa04650	2	131	0.0176978	0.0276529	HRAS|KRAS	http://www.genome.jp/kegg-bin/show_pathway?hsa04650/hsa:3845%09red/hsa:3265%09red
Ubiquinone and other terpenoid-quinone biosynthesis	KEGG PATHWAY	hsa00130	1	11	0.0181682	0.0281367	NQO1	http://www.genome.jp/kegg-bin/show_pathway?hsa00130/hsa:1728%09red
Estrogen signaling pathway	KEGG PATHWAY	hsa04915	2	138	0.0194844	0.0299103	HRAS|KRAS	http://www.genome.jp/kegg-bin/show_pathway?hsa04915/hsa:3845%09red/hsa:3265%09red
Signaling pathways regulating pluripotency of stem cells	KEGG PATHWAY	hsa04550	2	140	0.0200083	0.0304474	HRAS|KRAS	http://www.genome.jp/kegg-bin/show_pathway?hsa04550/hsa:3845%09red/hsa:3265%09red
Phospholipase D signaling pathway	KEGG PATHWAY	hsa04072	2	148	0.0221622	0.0334343	HRAS|KRAS	http://www.genome.jp/kegg-bin/show_pathway?hsa04072/hsa:3845%09red/hsa:3265%09red
Protein processing in endoplasmic reticulum	KEGG PATHWAY	hsa04141	2	165	0.0270404	0.0402355	NFE2L2|EIF2S1	http://www.genome.jp/kegg-bin/show_pathway?hsa04141/hsa:4780%09red/hsa:1965%09red
Selenocompound metabolism	KEGG PATHWAY	hsa00450	1	17	0.0271302	0.0402355	TXNRD1	http://www.genome.jp/kegg-bin/show_pathway?hsa00450/hsa:7296%09red
Tight junction	KEGG PATHWAY	hsa04530	2	170	0.0285505	0.0413869	BAP1|PRKAA1	http://www.genome.jp/kegg-bin/show_pathway?hsa04530/hsa:5562%09red/hsa:9223%09red
2-Oxocarboxylic acid metabolism	KEGG PATHWAY	hsa01210	1	18	0.0286161	0.0413869	ACO1	http://www.genome.jp/kegg-bin/show_pathway?hsa01210/hsa:48%09red
Fatty acid biosynthesis	KEGG PATHWAY	hsa00061	1	18	0.0286161	0.0413869	ACSL3	http://www.genome.jp/kegg-bin/show_pathway?hsa00061/hsa:2181%09red
Alcoholism	KEGG PATHWAY	hsa05034	2	180	0.0316697	0.0454279	HRAS|KRAS	http://www.genome.jp/kegg-bin/show_pathway?hsa05034/hsa:3845%09red/hsa:3265%09red
Axon guidance	KEGG PATHWAY	hsa04360	2	181	0.0319888	0.0455125	HRAS|KRAS	http://www.genome.jp/kegg-bin/show_pathway?hsa04360/hsa:3845%09red/hsa:3265%09red
Transcriptional misregulation in cancer	KEGG PATHWAY	hsa05202	2	186	0.0336031	0.0474237	IL6|CDKN1A	http://www.genome.jp/kegg-bin/show_pathway?hsa05202/hsa:3569%09red/hsa:1026%09red
Herpes simplex virus 1 infection	KEGG PATHWAY	hsa05168	3	492	0.0400723	0.0561012	IL6|EIF2S1|ZNF419	http://www.genome.jp/kegg-bin/show_pathway?hsa05168/hsa:79744%09red/hsa:3569%09red/hsa:1965%09red
Folate biosynthesis	KEGG PATHWAY	hsa00790	1	26	0.0404226	0.0561425	GCH1	http://www.genome.jp/kegg-bin/show_pathway?hsa00790/hsa:2643%09red
Regulation of actin cytoskeleton	KEGG PATHWAY	hsa04810	2	214	0.0432075	0.0595379	HRAS|KRAS	http://www.genome.jp/kegg-bin/show_pathway?hsa04810/hsa:3845%09red/hsa:3265%09red
Nicotinate and nicotinamide metabolism	KEGG PATHWAY	hsa00760	1	30	0.0462729	0.0618149	NNMT	http://www.genome.jp/kegg-bin/show_pathway?hsa00760/hsa:4837%09red
Pentose phosphate pathway	KEGG PATHWAY	hsa00030	1	30	0.0462729	0.0618149	G6PD	http://www.genome.jp/kegg-bin/show_pathway?hsa00030/hsa:2539%09red
Glyoxylate and dicarboxylate metabolism	KEGG PATHWAY	hsa00630	1	30	0.0462729	0.0618149	ACO1	http://www.genome.jp/kegg-bin/show_pathway?hsa00630/hsa:48%09red
Citrate cycle (TCA cycle)	KEGG PATHWAY	hsa00020	1	30	0.0462729	0.0618149	ACO1	http://www.genome.jp/kegg-bin/show_pathway?hsa00020/hsa:48%09red
Antifolate resistance	KEGG PATHWAY	hsa01523	1	31	0.04773	0.0632783	IL6	http://www.genome.jp/kegg-bin/show_pathway?hsa01523/hsa:3569%09red
Ras signaling pathway	KEGG PATHWAY	hsa04014	2	232	0.0498573	0.0656017	HRAS|KRAS	http://www.genome.jp/kegg-bin/show_pathway?hsa04014/hsa:3845%09red/hsa:3265%09red
Prion diseases	KEGG PATHWAY	hsa05020	1	35	0.0535364	0.0699169	IL6	http://www.genome.jp/kegg-bin/show_pathway?hsa05020/hsa:3569%09red
African trypanosomiasis	KEGG PATHWAY	hsa05143	1	37	0.0564265	0.0726077	IL6	http://www.genome.jp/kegg-bin/show_pathway?hsa05143/hsa:3569%09red
Aldosterone-regulated sodium reabsorption	KEGG PATHWAY	hsa04960	1	37	0.0564265	0.0726077	KRAS	http://www.genome.jp/kegg-bin/show_pathway?hsa04960/hsa:3845%09red
Glycine, serine and threonine metabolism	KEGG PATHWAY	hsa00260	1	40	0.0607455	0.0775946	CBS	http://www.genome.jp/kegg-bin/show_pathway?hsa00260/hsa:102724560%09red
Graft-versus-host disease	KEGG PATHWAY	hsa05332	1	41	0.0621808	0.0788525	IL6	http://www.genome.jp/kegg-bin/show_pathway?hsa05332/hsa:3569%09red
Porphyrin and chlorophyll metabolism	KEGG PATHWAY	hsa00860	1	42	0.063614	0.0800896	HMOX1	http://www.genome.jp/kegg-bin/show_pathway?hsa00860/hsa:3162%09red
Fatty acid degradation	KEGG PATHWAY	hsa00071	1	44	0.0664739	0.0830923	ACSL3	http://www.genome.jp/kegg-bin/show_pathway?hsa00071/hsa:2181%09red
Type II diabetes mellitus	KEGG PATHWAY	hsa04930	1	46	0.0693252	0.0860419	SOCS1	http://www.genome.jp/kegg-bin/show_pathway?hsa04930/hsa:8651%09red
Cysteine and methionine metabolism	KEGG PATHWAY	hsa00270	1	49	0.0735861	0.0894275	CBS	http://www.genome.jp/kegg-bin/show_pathway?hsa00270/hsa:102724560%09red
Ovarian steroidogenesis	KEGG PATHWAY	hsa04913	1	49	0.0735861	0.0894275	PTGS2	http://www.genome.jp/kegg-bin/show_pathway?hsa04913/hsa:5743%09red
Intestinal immune network for IgA production	KEGG PATHWAY	hsa04672	1	49	0.0735861	0.0894275	IL6	http://www.genome.jp/kegg-bin/show_pathway?hsa04672/hsa:3569%09red
Arginine and proline metabolism	KEGG PATHWAY	hsa00330	1	50	0.0750021	0.0905198	SAT1	http://www.genome.jp/kegg-bin/show_pathway?hsa00330/hsa:6303%09red
Regulation of lipolysis in adipocytes	KEGG PATHWAY	hsa04923	1	55	0.0820504	0.097679	PTGS2	http://www.genome.jp/kegg-bin/show_pathway?hsa04923/hsa:5743%09red
Pathogenic Escherichia coli infection	KEGG PATHWAY	hsa05130	1	55	0.0820504	0.097679	TLR4	http://www.genome.jp/kegg-bin/show_pathway?hsa05130/hsa:7099%09red
Glutathione metabolism	KEGG PATHWAY	hsa00480	1	56	0.0834537	0.0986783	G6PD	http://www.genome.jp/kegg-bin/show_pathway?hsa00480/hsa:2539%09red
Fatty acid metabolism	KEGG PATHWAY	hsa01212	1	57	0.0848549	0.0996618	ACSL3	http://www.genome.jp/kegg-bin/show_pathway?hsa01212/hsa:2181%09red
Lysine degradation	KEGG PATHWAY	hsa00310	1	59	0.087651	0.102259	SETD1B	http://www.genome.jp/kegg-bin/show_pathway?hsa00310/hsa:23067%09red
Steroid hormone biosynthesis	KEGG PATHWAY	hsa00140	1	60	0.0890458	0.103199	AKR1C2	http://www.genome.jp/kegg-bin/show_pathway?hsa00140/hsa:1646%09red
Basal cell carcinoma	KEGG PATHWAY	hsa05217	1	63	0.0932179	0.106622	CDKN1A	http://www.genome.jp/kegg-bin/show_pathway?hsa05217/hsa:1026%09red
Cytosolic DNA-sensing pathway	KEGG PATHWAY	hsa04623	1	63	0.0932179	0.106622	IL6	http://www.genome.jp/kegg-bin/show_pathway?hsa04623/hsa:3569%09red
Epithelial cell signaling in Helicobacter pylori infection	KEGG PATHWAY	hsa05120	1	70	0.10288	0.116909	CXCL2	http://www.genome.jp/kegg-bin/show_pathway?hsa05120/hsa:2920%09red
Platinum drug resistance	KEGG PATHWAY	hsa01524	1	73	0.10699	0.120795	CDKN1A	http://www.genome.jp/kegg-bin/show_pathway?hsa01524/hsa:1026%09red
Thyroid hormone synthesis	KEGG PATHWAY	hsa04918	1	74	0.108355	0.121553	DUOX2	http://www.genome.jp/kegg-bin/show_pathway?hsa04918/hsa:50506%09red
PPAR signaling pathway	KEGG PATHWAY	hsa03320	1	76	0.111081	0.123816	ACSL3	http://www.genome.jp/kegg-bin/show_pathway?hsa03320/hsa:2181%09red
Peroxisome	KEGG PATHWAY	hsa04146	1	83	0.120556	0.133527	ACSL3	http://www.genome.jp/kegg-bin/show_pathway?hsa04146/hsa:2181%09red
TGF-beta signaling pathway	KEGG PATHWAY	hsa04350	1	94	0.135244	0.148854	HAMP	http://www.genome.jp/kegg-bin/show_pathway?hsa04350/hsa:57817%09red
Parathyroid hormone synthesis, secretion and action	KEGG PATHWAY	hsa04928	1	106	0.150993	0.165149	CDKN1A	http://www.genome.jp/kegg-bin/show_pathway?hsa04928/hsa:1026%09red
Th17 cell differentiation	KEGG PATHWAY	hsa04659	1	107	0.152293	0.165536	IL6	http://www.genome.jp/kegg-bin/show_pathway?hsa04659/hsa:3569%09red
Leukocyte transendothelial migration	KEGG PATHWAY	hsa04670	1	112	0.158761	0.171502	CYBB	http://www.genome.jp/kegg-bin/show_pathway?hsa04670/hsa:1536%09red
AMPK signaling pathway	KEGG PATHWAY	hsa04152	1	120	0.169011	0.181453	PRKAA1	http://www.genome.jp/kegg-bin/show_pathway?hsa04152/hsa:5562%09red
Lysosome	KEGG PATHWAY	hsa04142	1	123	0.172822	0.184414	LAMP2	http://www.genome.jp/kegg-bin/show_pathway?hsa04142/hsa:3920%09red
Cell cycle	KEGG PATHWAY	hsa04110	1	124	0.174089	0.18464	CDKN1A	http://www.genome.jp/kegg-bin/show_pathway?hsa04110/hsa:1026%09red
Oocyte meiosis	KEGG PATHWAY	hsa04114	1	128	0.179137	0.187718	AURKA	http://www.genome.jp/kegg-bin/show_pathway?hsa04114/hsa:6790%09red
Osteoclast differentiation	KEGG PATHWAY	hsa04380	1	128	0.179137	0.187718	SOCS1	http://www.genome.jp/kegg-bin/show_pathway?hsa04380/hsa:8651%09red
Dopaminergic synapse	KEGG PATHWAY	hsa04728	1	131	0.182903	0.190524	ARNTL	http://www.genome.jp/kegg-bin/show_pathway?hsa04728/hsa:406%09red
Ubiquitin mediated proteolysis	KEGG PATHWAY	hsa04120	1	137	0.190384	0.197143	SOCS1	http://www.genome.jp/kegg-bin/show_pathway?hsa04120/hsa:8651%09red
Retrograde endocannabinoid signaling	KEGG PATHWAY	hsa04723	1	148	0.203925	0.209923	PTGS2	http://www.genome.jp/kegg-bin/show_pathway?hsa04723/hsa:5743%09red
Ribosome	KEGG PATHWAY	hsa03010	1	153	0.210006	0.214918	UBC	http://www.genome.jp/kegg-bin/show_pathway?hsa03010/hsa:6233%09red
Cushing syndrome	KEGG PATHWAY	hsa04934	1	155	0.212425	0.216131	CDKN1A	http://www.genome.jp/kegg-bin/show_pathway?hsa04934/hsa:1026%09red
RNA transport	KEGG PATHWAY	hsa03013	1	165	0.224415	0.227009	EIF2S1	http://www.genome.jp/kegg-bin/show_pathway?hsa03013/hsa:1965%09red
Calcium signaling pathway	KEGG PATHWAY	hsa04020	1	193	0.257038	0.258515	PHKG2	http://www.genome.jp/kegg-bin/show_pathway?hsa04020/hsa:5261%09red
Focal adhesion	KEGG PATHWAY	hsa04510	1	199	0.263851	0.263851	HRAS	http://www.genome.jp/kegg-bin/show_pathway?hsa04510/hsa:3265%09red
KEGG, Kyoto Encyclopedia of Genes and Genomes.
